# Supplementary material
Source: PubMed Central journal article supplement (PMC3177976)
Supplement: NIHMS320246-supplement-2.pdf [file NIHMS320246-supplement-2.pdf]

flow cytometry. (C) Dyn2 K44A inhibits transferrin uptake. Vero cells expressing a Dyn2-K44A-eGFP fusion protein were pulsed with 1  $\mu\text{g}/\text{mL}$  Alexa-647-labeled transferrin for the indicated times and VLP uptake was assessed by flow cytometry. (D) Effect of Dyn2 K44A expression on uptake of EBOV VLPs. Representative maximal Z projections of cells transfected with eGFP or Dyn2-K44A-eGFP and exposed to RFP-EBOV VLPs at 37°C for 30 min are shown. Scale bars, 5  $\mu\text{M}$  (E) Endogenous dynamin-2 colocalizes with EBOV VLPs. Vero cells were exposed to the indicated ligands or eGFP/RFP-VLPs for 10 min at 37°C, and then fixed and visualized by confocal fluorescence microscopy. Endogenous dynamin was detected by staining with anti-dynamin primary antibody and an Alexa 594-conjugated secondary antibody. Scale bars, 10  $\mu\text{M}$ . (A-C) Means  $\pm$  SD of three replicates are shown.

**Figure 8. Effects of macropinocytosis and dynamin inhibitors on EBOV GP-dependent infection in monocytes and dendritic cells.** (A) Inhibitors of macropinocytosis and dynamin reduce VSV-GP $\Delta$ Muc infection in the Jaws murine dendritic cell line. Jaws cells were pre-treated with 1% DMSO, 60  $\mu\text{M}$  dynasore, 25  $\mu\text{M}$  EIPA, 2.5  $\mu\text{M}$  rottlerin, 0.01  $\mu\text{M}$  latrunculin A, 5  $\mu\text{M}$  ML9, or 50  $\mu\text{M}$  blebbistatin and then exposed to VSV-GP $\Delta$ Muc or VSV-G. Infection was scored by counting eGFP-positive cells. (B) Effects of dynasore and EIPA on infection by VSV-GP-FL and VSV-GP $\Delta$ Muc in adherent PBMCs. CD14-positive PBMCs were pre-treated with 0.5% DMSO, 60  $\mu\text{M}$  Dynasore, 25  $\mu\text{M}$  EIPA, or 300  $\mu\text{M}$  E-64d, and then exposed to virus. Infection was scored by counting eGFP-positive cells. (A-B) Means  $\pm$  SD of three replicates are shown.

**Supplementary Figure 1.** Inhibitors of macropinocytosis have similar effects on viral infection mediated by EBOV GP-FL and EBOV GP $\Delta$ Muc. (A) Inhibitors of macropinocytosis reduce infection by both VSV-GP-FL and VSV-GP $\Delta$ Muc. Vero cells were pre-treated with 1% DMSO, 20 mM ammonium chloride, 60  $\mu\text{M}$  dynasore, 25  $\mu\text{M}$  EIPA, 2.5  $\mu\text{M}$  rottlerin, 0.01  $\mu\text{M}$  latrunculin A, 5  $\mu\text{M}$  ML9, or 50  $\mu\text{M}$  blebbistatin, and then exposed to VSV-GP-FL, VSV-GP $\Delta$ Muc, or VSV-G. Infection was scored by counting eGFP-positive cells. (B) Inhibitors of macropinocytosis reduce VLP entry mediated by both GP-FL and GP $\Delta$ Muc. Vero cells pre-treated as above were exposed to  $\beta$ LaM-VLPs expressing EBOV GP $\Delta$ Muc or GP-FL. VLP entry was assessed by flow cytometry. (A-B) Means  $\pm$  SD of three replicates are shown.
